# FFAR1 and FFAR4 additively cooperate to control glucose tolerance and insulin secretion in male mice

Marine L. Croze<sup>1</sup>, Arthur Guillaume<sup>1</sup>, Mélanie Ethier<sup>1</sup>, Grace Fergusson<sup>1</sup>, Julien Ghislain<sup>1</sup>, Vincent Poitout<sup>1,2</sup>

<sup>1</sup> Montreal Diabetes Research Center, CRCHUM, Montréal, QC, Canada; <sup>2</sup> Department of Medicine, Université de Montréal, Montréal, QC, Canada

Running title: FFAR1 and FFAR4 regulation of insulin secretion

Corresponding author and reprint requests:

Vincent Poitout, DVM, PhD

CRCHUM

900 rue St Denis, Montréal, QC, H2X 0A9 - CANADA

Tel: (514) 890-8044

Email: [vincent.poitout@umontreal.ca](mailto:vincent.poitout@umontreal.ca)

**Keywords:** Gpr120/FFAR4, Gpr40/FFAR1, insulin, islet of Langerhans, glucose homeostasis.

This work was supported by a Discovery Grant from the Natural Sciences and Engineering Research Council of Canada (RGPIN-2016-03952 to V.P.). M.L.C. was supported by a fellowship from the Société Francophone du Diabète and by a postdoctoral fellowship from the Montreal Diabetes Research Center.

The authors have no relevant conflict of interest to disclose.

## ABSTRACT

The fatty-acid receptors FFAR1 (Gpr40) and FFAR4 (Gpr120) are implicated in the regulation of insulin secretion and insulin sensitivity, respectively. Although the properties of Gpr120 and Gpr40 converge on glucose homeostasis, few studies have addressed possible interactions between these two receptors in the control of  $\beta$  cell function. Here we generated mice deficient in Gpr120 or Gpr40, alone or in combination, and metabolically phenotyped male and female mice fed a normal chow or high-fat diet. We assessed insulin secretion in isolated mouse islets exposed to selective Gpr120 and Gpr40 agonists singly or in combination. Following normal chow feeding, body weight and energy intake were unaffected by deletion of either receptor, although fat mass increased in Gpr120 knockout (KO) females. Fasting blood glucose levels increased in Gpr120/40 double KO mice, and in a sex-dependent manner in Gpr120 KO and Gpr40 KO animals. Oral glucose tolerance was reduced in Gpr120/40 double KO male mice and in Gpr120 KO females, whereas insulin secretion and insulin sensitivity were unaffected. In hyperglycemic clamps, the glucose infusion rate and disposition index were lower in Gpr120/40 double KO. In contrast, we did not observe changes in glucose tolerance in either single or double KO animals under high-fat feeding. In isolated wild-type islets, the combination of selective Gpr120 and Gpr40 agonists additively increased insulin secretion compared to each agonist alone. We conclude that Gpr120 and Gpr40 cooperate in an additive manner to regulate glucose homeostasis and insulin secretion in male mice.

## INTRODUCTION

Insulin resistance and defective insulin secretion are hallmarks of type 2 diabetes (T2D). A number of G protein-coupled receptors (GPCR) that regulate insulin sensitivity and pancreatic  $\beta$ -cell function are validated targets for the treatment of T2D (1). Among these, the long-chain fatty acid receptors FFAR1 (Gpr40) and FFAR4 (Gpr120) have been the subject of increasing interest in recent years as their activation has numerous beneficial effects on glucose and energy homeostasis in preclinical T2D models.

In rodents, Gpr120 is expressed in several tissues implicated in energy homeostasis including the central nervous system, enteroendocrine cells, liver, bone, adipose tissue and macrophages (2). Gpr120 activation in adipocytes and macrophages alleviates obesity-induced insulin resistance (3-5) in part via interaction with peroxisome proliferator-activated receptor  $\gamma$  (6). Gpr120 also promotes adipogenesis (7-9) and brown adipose tissue thermogenesis (10,11), regulates food intake (12) and modulates gut endocrine hormone secretion, including ghrelin (13-15) and the incretin hormones glucagon-like peptide-1 (GLP-1) (16), gastric inhibitory polypeptide (GIP) (17) and cholecystokinin (18,19). Gpr120 is also expressed in pancreatic islets where its activation mitigates  $\beta$ -cell dysfunction (20) and apoptosis (21) and modulates insulin (22-25), glucagon (26), and somatostatin (27) secretion. Recently, we demonstrated that Gpr120 activation potentiates glucose-stimulated insulin secretion (GSIS) and potentiates arginine-induced glucagon secretion in part through inhibition of somatostatin release (28). Despite the evidence for a role of Gpr120 in the regulation of islet hormone secretion, Gpr120 deficient mice have reportedly normal  $\beta$ -cell function (3,5).

In rodents, Gpr40 is predominantly expressed in enteroendocrine cells and pancreatic  $\beta$  cells (29,30). Activation of Gpr40 potentiates GSIS (29,31,32) and increases secretion of the incretin hormones GLP-1, GIP and cholecystokinin (19,33-36) both ex vivo and in vivo. Recent studies suggest that in the  $\beta$  cell Gpr40 primarily responds to endogenous fatty acids which are released by the  $\beta$  cell in response to glucose stimulation and act in an autocrine manner to potentiate insulin secretion (37). Although absence of Gpr40 is largely inconsequential for glucose tolerance or energy metabolism under normal physiological conditions (31,38,39), high-fat diet (HFD) fed Gpr40-null mice develop fasting hyperglycemia due to insufficient insulin secretion (40).

Complementarity between Gpr120 and Gpr40 tissue expression and function prompted us to investigate their possible interaction in the control of glucose homeostasis and insulin secretion. Redundancy between Gpr120 and Gpr40 has been described in the gut where oral triglyceride-induced increases in plasma GIP and GLP-1 are dramatically reduced in double Gpr120/40 knockout (KO) but not Gpr120 KO or Gpr40 KO mice (36). Furthermore, coactivation of Gpr120 and Gpr40 in vivo with selective synthetic agonists or a dual agonist improves glucose control in *db/db* mice compared to activation of each receptor alone (41). However, whether Gpr120 and Gpr40 cooperate to improve glucose control under physiological and pathophysiological (HFD) conditions has not been addressed. In this study we investigated possible functional interactions between these lipid GPCR in the control of glucose homeostasis with a particular emphasis on  $\beta$ -cell function. We generated single and double Gpr120 and Gpr40 KO mice and compared metabolic parameters, glucose and insulin tolerance as well as  $\beta$ -cell function in both male and female mice fed a normal chow or HFD.

## MATERIALS AND METHODS

### Reagents and solutions

RPMI-1640 and FBS were from Life Technologies Inc. (Burlington, ON, Canada). Penicillin/Streptomycin was from Multicell Wisent Inc (Saint-Jean-Baptiste, QC, Canada). Fatty-acid-free BSA was from Equitech-Bio (Kerrville, TX, USA). Insulin radioimmunoassay (RIA) kit was from MilliporeSigma (Billerica, MA, USA). Insulin and C-peptide ELISA kits were from Alpco Diagnostics (Salem, NH, USA). Insulin (Humulin-R 100U/mL) was from Eli Lilly (Toronto, ON, Canada). Compound A (Cpd A) was from Cayman Chemical (Ann Arbor, MI, USA) and TAK-875 was from Selleckchem (Houston, TX, USA). All other reagents were from MilliporeSigma unless otherwise specified.

### Animals

All procedures involving animals were approved by the Institutional Committee for the Protection of Animals at the Centre Hospitalier de l'Université de Montréal. All mice were housed under controlled temperature on a 12h light/dark cycle with unrestricted access to water and laboratory chow. Mutant Gpr40 (31) and Gpr120 (28) colonies on a C57BL/6N background were maintained and genotyped as previously described. Male and female wild-type (WT, Gpr40<sup>+/+</sup>;Gpr120<sup>+/+</sup>), Gpr40KO (Gpr40<sup>-/-</sup>;Gpr120<sup>+/+</sup>), Gpr120KO (Gpr40<sup>+/+</sup>;Gpr120<sup>-/-</sup>) and Gpr120/40KO (Gpr40<sup>-/-</sup>;Gpr120<sup>-/-</sup>) experimental animals were generated in crosses between double heterozygotes (Gpr40<sup>+/-</sup>;Gpr120<sup>+/-</sup>). Animals were born at the expected Mendelian ratio. Both males and females were used for in vivo experiments and studied in separate cohorts. Animals were fed ad libitum with normal chow diet (CD; #2018 Teklad Global 18% protein rodent diet; 58% carbohydrate, 24% protein and 18% fat on a caloric basis; Harlan Teklad,

Madison, WI) throughout the study or, after 8 weeks of age, switched to a HFD (#D12492; 60% fat, 20% protein and 20% carbohydrate on a caloric basis; Research Diets Inc., New Brunswick, NJ). Body weight, food intake and fed blood glucose were monitored weekly from 6-8 weeks of age.

## **Metabolic tests**

Oral Glucose Tolerance Tests (oGTT) were performed on 4-6 hour fasted mice by measuring tail blood glucose and plasma insulin levels before (t=0 min) and 15, 30, 45, 60, 90 and 120 min after oral glucose administration (Dextrose 1g/kg BW). Tail blood glucose was measured using the hand-held glucometer Accu-Chek (Roche, Indianapolis, IN) and plasma insulin was measured by ELISA at 0, 15 and 30 min.

Intraperitoneal Insulin Tolerance Tests (ipITT). Insulin (0.5 UI/kg, BW) was administered intraperitoneally on 4-6 hour fasted mice and tail blood glucose was measured before (t=0 min) and 15, 30, 45, 60, 90 and 120 min after insulin injection. Fasting insulinemia was measured by ELISA on plasma samples from tail vein blood collected before insulin injection.

Body weight composition was assessed with the EchoMRI Analyzer-700 (Echo Medical System, Houston, TX).

Hyperglycemic clamps (HGC). One-step HGC were performed in conscious, ad libitum fed animals as described (39). Briefly, a 20% dextrose solution (Baxter, Mississauga, ON) was infused via a jugular catheter. Mice initially received a 90-second bolus (140 mg/kg/minute) and then the glucose infusion rate (GIR) was adjusted to maintain blood glucose between 14.5 and 17.7 mmol/l in females and between 15.7 and 19.7 mmol/l in males for 80 min. The insulin

sensitivity index (M/I) was calculated as the glucose infusion rate (M) divided by the average plasma insulin during the last 30 min (i.e. from 50 to 80 min) of the clamp (I). The disposition index (DI) was calculated by multiplying the M/I by the average plasma C-peptide during the last 30 min of the clamp. Blood samples were collected from the tail to measure glucose, and plasma insulin and C-peptide were measured by ELISA (Alpco Diagnostics, Salem, NH) at the time points indicated in the Figure legends.

### **Islet isolation and static incubations for insulin secretion**

Islets were isolated from 10-12 week-old male WT mice by collagenase digestion and dextran density gradient centrifugation as described previously (31) and recovered overnight in RPMI 1640 supplemented with 10% (wt/vol) FBS, 100 U/ml penicillin/streptomycin and 11 mM glucose. After recovery, triplicate batches of 20 islets each were incubated twice in KRBH (pH 7.4) with 0.1% (w/v) fatty-acid-free BSA and 2.8 mM glucose for 20 min., followed by a 1-hour static incubation in KRBH in the presence of 2.8 or 16.7 mM glucose. Insulin was measured in the supernatant by RIA and intracellular insulin content was measured after acid-alcohol extraction.

### **Statistical analyses**

Data are expressed as mean  $\pm$  SEM. Significance was tested using ordinary one-way ANOVA or Brown-Forsythe and Welch ANOVA tests with their correction in cases of variance heterogeneity, two-way ANOVA with no assumption of sphericity and with post hoc adjustment for multiple comparisons, as appropriate, using GraphPad Instat (GraphPad Software, San Diego, CA) or three-way ANOVA. Tukey or Dunnett's post hoc tests were performed as indicated in figure legends.  $P < 0.05$  was considered significant. Data points considered as outliers were

excluded based on Grubbs' test using the online calculator at:  
<https://www.graphpad.com/quickcalcs/Grubbs1.cfm>.

## RESULTS

### Lean Gpr120/40KO mice are glucose intolerant and exhibit reduced $\beta$ cell function

In a first cohort of animals, WT, Gpr40KO, Gpr120KO and double Gpr120/40KO male and female mice were fed CD for 30 weeks. Metabolic parameters were assessed on a weekly basis and Echo-MRI, glucose and insulin tolerance tests, and HGC were performed as indicated (Fig. 1A). WT, Gpr40KO, Gpr120KO and double Gpr120/40KO male and female mice showed similar increases in body weight and energy intake over the course of the study (Fig. 1B-E). Percentages of fat and lean mass as assessed by Echo-MRI at 27-29 weeks of age were unaffected by genotype in male mice, whereas the proportion of fat to lean mass was slightly increased in female Gpr120KO compared to WT mice (Fig. 1F and G). Fasting blood glucose levels were significantly increased at 12 and 20 weeks of age in male and at all time points in female Gpr120/40KO compared to WT mice (Fig. 2A and B). A significant increase in fasting blood glucose compared to WT controls was also detected in male Gpr120KO mice at 20 weeks of age, in female Gpr40KO mice at 16, 20 and 24 weeks of age, and at all time points in female Gpr120KO mice. Average fed blood glucose levels during the study were significantly increased in male Gpr40KO vs. WT mice; and in female Gpr40KO and Gpr120/40KO mice vs. their WT and Gpr120KO littermates (Supplementary Fig. 1 (42)).

oGTT performed at 10-12 weeks of age revealed prolonged glucose excursions in male Gpr120/40KO mice that were significantly different between 60-120 min post oral glucose load compared to WT controls and at 120 min compared to Gpr40KO mice (Fig. 2C). In females,



both single and double Gpr120/40KO mice exhibited reduced glucose tolerance between 45-90 min post oral glucose administration compared to WT mice, but the difference was significant only for the Gpr120KO mice (Fig. 2D). oGTT performed at 18-20 weeks of age revealed mild glucose intolerance in male Gpr120/40KO mice at 90 min and in female Gpr120/40KO and Gpr120KO mice between 90-120 min compared to WT controls (Fig. 2E and F). Plasma insulin levels determined during the test revealed no significant differences between genotypes in either male or female mice (Supplementary Fig. 2 (42)).

ipITT performed on male and female mice at 14-16 week of age revealed no significant difference in insulin tolerance between genotypes (Supplementary Fig. 2 (42)).

We performed HGC at 28-30 weeks of age to assess  $\beta$  cell function in vivo. Blood glucose levels were within the target range between 50 and 80 min of the clamp (Fig. 3A and B). Although plasma insulin (Fig. 3C and D) and C-peptide (data not shown) levels were similar in the 4 genotypes, the GIR and DI were significantly lower in male Gpr120/40KO vs. Gpr40KO mice (Fig. 3E and G). A similar, albeit not statistically significant trend was observed in female mice (Fig. 3F and H). Taken together these data indicate that the combined deletion of Gpr120 and Gpr40 leads to glucose intolerance in both sexes and impaired  $\beta$  cell function in male mice. However, the absence of significant differences between Gpr120/40KO and Gpr120KO mice suggests that deletion of Gpr120 accounts for the majority of this phenotype.

#### **Absence of differences in glucose tolerance in high-fat fed Gpr120/40KO mice**

In a second cohort of animals, WT, Gpr40KO, Gpr120KO and Gpr120/40KO male and female mice were fed either CD or HFD beginning at 8 weeks of age for a total of 12 weeks. Metabolic parameters were assessed on a weekly basis. Echo-MRI and oral glucose tolerance tests were

performed as indicated (Fig. 4A). Both male and female HFD-fed mice accumulated more weight than CD-fed animals, as expected, but no differences were detected between genotypes on either feeding regimen (Fig. 4B and C). Male Gpr120/40KO mice fed a HFD exhibited reduced energy intake compared to Gpr120KO and WT controls (Fig. 4D). In contrast, females showed no differences in energy intake between genotype following either CD or HFD (Fig. 4E). Relative fat mass was increased and lean mass decreased in HFD fed compared to CD-fed male and female animals but no differences were detected between genotypes (Fig. 4F and G).

Average fed blood glucose levels throughout the study were increased in CD-fed male Gpr120/40KO compared to all other genotypes and in HFD-fed Gpr120/40KO and Gpr120KO compared to WT mice but unaffected by genotype in female mice (Supplementary Fig. 3 (42)).

oGTT performed at 20 weeks of age revealed reduced glucose tolerance in male Gpr120/40KO mice fed a CD at 60 and 120 min compared to WT controls (Fig. 5A), similar to our previous findings (Fig. 2). However, plasma insulin levels determined during the test revealed no significant differences between genotypes (Fig. 5B). A non-significant trend for reduced glucose tolerance was observed in Gpr120/40KO females (Fig. 5C), without changes in plasma insulin levels (Fig. 5D). Following HFD, no significant differences in glucose tolerance or plasma insulin levels were detected between genotypes in either male (Fig. 5E and F) or female (Fig. 5G and H) mice. Taken together these data suggest that combined deletion of Gpr120 and Gpr40 does not aggravate glucose intolerance under HFD in either male or female mice.

### **Gpr120 and Gpr40 agonists additively enhance GSIS in isolated mouse islets**

As lean male Gpr120/40KO animals showed reduced  $\beta$  cell function in HGC (Fig. 3), we asked whether co-stimulation of both Gpr120 and Gpr40 would additively enhance GSIS. Islets were

isolated from lean male WT mice and insulin secretion was assessed in response to the selective Gpr40 agonist TAK-875 and Gpr120 agonist Cpd A, singly or in combination (Fig. 6). Glucose alone increased insulin secretion, as expected, and although neither TAK-875 nor Cpd A alone significantly potentiated this effect, combined exposure additively increased insulin secretion (Fig. 6A and B). No significant differences were detected in total insulin content (Fig. 6C). These data indicate that combined activation of Gpr120 and Gpr40 additively potentiate GSIS.

## DISCUSSION

The objective of this study was to assess possible interactions between Gpr120 and Gpr40 in the control of glucose homeostasis and  $\beta$  cell function under physiological conditions and metabolic stress. By comparing adult, chow-fed WT and Gpr120 and Gpr40 single and double KO mice we showed that the combined loss of both genes leads to a reduction in oral glucose tolerance and  $\beta$  cell function in HGC in male mice, with a similar trend in females. In most cases, the Gpr120/Gpr40 KO mice phenotype seemed to be mainly related to the loss of Gpr120 and slightly aggravated by the loss of Gpr40, suggesting that the two receptors signaling pathways act additively rather than synergistically. In contrast, no significant differences between genotypes were detected in glucose and energy homeostasis following 12 weeks of high-fat feeding in either sex. We then showed that selective agonists for Gpr120 and Gpr40 additively potentiated GSIS in isolated islets ex vivo. Taken together, these data indicated that Gpr120 and Gpr40 contribute to glucose homeostasis through additive regulation of insulin secretion in male mice.

**Gpr120 KO** - Deletion of Gpr120 had no significant impact on body weight in CD-fed male or female mice, in agreement with a number of previous studies (3,5). In contrast, Suckow et al.

(26) observed an increase in body mass in Gpr120-null mice following a similar diet regimen. In our study, fat mass was increased in female Gpr120KO mice which may be accounted for by the reduced metabolic rate, inhibition of adipocyte lipolysis and increased size of adipocytes observed previously in Gpr120-null mice (5,41). Fasting glucose levels were elevated in male and female Gpr120KO mice under CD, but oral glucose tolerance was unaffected in male and mildly reduced in female Gpr120KO mice, and there were no differences in circulating insulin levels or insulin tolerance. These findings agree with previous reports (5,23). They do, however, contrast with some studies which found glucose intolerance (3,26) and elevated plasma insulin levels (3) in Gpr120-null male mice. Following HFD, body weight, glucose tolerance and insulin levels were not affected in either male or female Gpr120KO mice, similar to previous findings in male mice (3,4,43). This is in contrast to the findings of Ichimura et al. (5) who reported that HFD-fed Gpr120-null male mice gain more weight and are glucose intolerant. Discrepancies in Gpr120-null metabolic phenotypes may be accounted for by differences in diet composition and genetic background, such as the mixed C57Bl/6/129 used by Ichimura et al. (5) vs. the pure C57Bl/6N used by Bjursell et al. (43) and in this study. It should be noted, however, that a role of Gpr120 signaling has been demonstrated in the context of chronic administration of specific agonists such as Cpd A (4,6,25) and GSK137647 (25) which attenuate the negative effects of HFD on energy and glucose homeostasis in WT but not *Gpr120*-null mice. This suggests that during metabolic stress and/or chronic feeding with a diet poor in omega-3 fatty acids, levels of endogenous Gpr120 ligands may be insufficient to confer a protective effect.

**Gpr40 KO** - Deletion of Gpr40 alone had no significant impact on energy homeostasis in male or female mice fed either CD or HFD, as shown previously (31,39,40,44). Glucose and insulin tolerance and insulin secretion in CD-fed Gpr40KO mice were also largely unaffected, as

previously observed (31). Contrary to our previous findings (40), we did not detect significant differences in fasting glucose levels in chow-fed, male Gpr40KO mice vs WT. This could be accounted for by a greater statistical power in our previous study, in which only 2 groups with a larger sample size were compared, and/or differences in the age of the mice (7 weeks in (40) vs 12-24 weeks in this study). In this study, we found however that female Gpr40KO mice had higher fasting glucose, and male and female mice had higher fed glucose, than WT controls. The significant reduction in insulin levels previously detected during HGC in Gpr40-null mice (39) was not seen in the present study, which may be due to difference in the age and/or strain of the animals. The nicotinamide nucleotide transhydrogenase mutation and other polymorphisms in the C57Bl/6J background used in our previous study (39) – vs. the C57Bl/6N background used here - are known to attenuate insulin secretion (45) and may interact with the Gpr40 mutation to aggravate the secretory defect. In a HFD study by Kebede et al. (40) we observed a precocious increase in fasting blood glucose levels after 3 weeks of diet in male Gpr40KO mice which normalized after 8 weeks, similar to our finding after 12 weeks of diet.

**Double Gpr120 and Gpr40 KO** - In mice fed a CD, we observed an increase in fasting glucose levels in both male and female Gpr120/40KO and a decrease in glucose tolerance in males. These changes were not observed in any of the groups under HFD. Glucose intolerance was more pronounced in double Gpr120/40KO compared to single Gpr120KO or Gpr40KO mice, indicative of an additive effect. The reduced glucose tolerance in Gpr120/40KO mice was likely due to deletion of the genes in pancreatic islets, but also possibly reduced incretin hormone secretion. Along these lines, Ekberg et al. (36) demonstrated that Gpr120 and Gpr40 are highly expressed in GLP-1 and GIP-secreting cells in the gut, and that the combined loss of the two receptors leads to a major reduction in GLP-1 and GIP levels following oral triglyceride

administration, which is not seen in mice deficient in each receptor alone. HGC revealed impaired  $\beta$ -cell function, as assessed by the DI, in male Gpr120/40KO vs single Gpr40KO, but this defect seem to be mainly attributable to the deletion of Gpr120 and slightly aggravated by the additional loss of Gpr40. A non-significant trend was detected in female Gpr120/40KO mice. Differences between male and female mice in our study may be due to a number of sex-related factors known to contribute to sex differences in metabolism (46). Alterations in glucose homeostasis in Gpr120/40KO mice following CD but not HFD are notable for their similarity to Gpr120KO, which show the same trend. We surmise that HFD may diminish Gpr120 signaling thereby limiting the effect of gene loss in single and double Gpr120KO mice compared to Gpr40KO and WT animals. This could be in part related to lower intake of Gpr120 ligands, since HFD are poor in  $\omega$ -3 polyunsaturated FAs compared to CD.

**Isolated islets** – The stimulatory effects of the Gpr120 agonist Cpd A and the Gpr40 agonist TAK-875 were additive and not synergistic. This is consistent with our in vivo observations in double KO mice and suggests that the signaling mechanisms of the two receptors in islets are independent. Recently, using a  $\delta$ -cell specific Gpr120 KO mouse we showed that Cpd A potentiates GSIS via inhibition of somatostatin secretion, alleviating an inhibitory signal that restricts insulin secretion (28). In contrast, Gpr40 is predominantly expressed in islet  $\beta$  cells where its activation promotes insulin secretion (32). This model is consistent with our observation that the stimulatory effects of Gpr120 and Gpr40 on insulin secretion are additive rather than synergistic.

**Conclusion** - Our results show that the combined loss of Gpr120 and Gpr40 leads to glucose intolerance and defective  $\beta$  cell function in male mice. Our data also suggest that the two

receptors signaling cooperate in an additive rather than in a synergistic manner to regulate insulin secretion. These finding contribute to our understanding of the role of these fatty-acid GPCR in the regulation of glucose homeostasis and islet function.

## ACKNOWLEDGEMENTS

We thank Annie Levert and Caroline Tremblay (CRCHUM) for valuable technical assistance.

## DATA AVAILABILITY

The datasets generated during and/or analyzed during the current study are not publicly available but are available from the corresponding author on reasonable request.

## REFERENCES

1. Ahren B. Islet G protein-coupled receptors as potential targets for treatment of type 2 diabetes. *Nat Rev Drug Discov* 2009;8(5):369-385.
2. Moniri NH. Free-fatty acid receptor-4 (GPR120): Cellular and molecular function and its role in metabolic disorders. *Biochem Pharmacol* 2016;110-111:1-15.
3. Oh DY, Talukdar S, Bae EJ, Imamura T, Morinaga H, Fan W, Li P, Lu WJ, Watkins SM, Olefsky JM. GPR120 is an omega-3 fatty acid receptor mediating potent anti-inflammatory and insulin-sensitizing effects. *Cell* 2010;142(5):687-698.
4. Oh da Y, Walenta E, Akiyama TE, Lagakos WS, Lackey D, Pessentheiner AR, Sasik R, Hah N, Chi TJ, Cox JM, Powels MA, Di Salvo J, Sinz C, Watkins SM, Armando AM, Chung H, Evans RM, Quehenberger O, McNelis J, Bogner-Strauss JG, Olefsky JM. A Gpr120-selective agonist improves insulin resistance and chronic inflammation in obese mice. *Nat Med* 2014;20(8):942-947.

5. Ichimura A, Hirasawa A, Poulain-Godefroy O, Bonnefond A, Hara T, Yengo L, Kimura I, Leloire A, Liu N, Iida K, Choquet H, Besnard P, Lecoecur C, Vivequin S, Ayukawa K, Takeuchi M, Ozawa K, Tauber M, Maffei S, Morandi A, Buzzetti R, Elliott P, Pouta A, Jarvelin MR, Korner A, Kiess W, Pigeyre M, Caiazzo R, Van Hul W, Van Gaal L, Horber F, Balkau B, Levy-Marchal C, Rouskas K, Kouvatsi A, Hebebrand J, Hinney A, Scherag A, Pattou F, Meyre D, Koshimizu TA, Wolowczuk I, Tsujimoto G, Froguel P. Dysfunction of lipid sensor GPR120 leads to obesity in both mouse and human. *Nature* 2012;483(7389):350-354.
6. Paschoal VA, Walenta E, Talukdar S, Pessentheiner AR, Osborn O, Hah N, Chi TJ, Tye GL, Armando AM, Evans RM, Chi NW, Quehenberger O, Olefsky JM, Oh DY. Positive Reinforcing Mechanisms between GPR120 and PPAR $\gamma$  Modulate Insulin Sensitivity. *Cell Metab* 2020;31(6):1173-1188.e1175.
7. Gotoh C, Hong YH, Iga T, Hishikawa D, Suzuki Y, Song SH, Choi KC, Adachi T, Hirasawa A, Tsujimoto G, Sasaki S, Roh SG. The regulation of adipogenesis through GPR120. *Biochem Biophys Res Commun* 2007;354(2):591-597.
8. Song T, Zhou Y, Peng J, Tao YX, Yang Y, Xu T, Peng J, Ren J, Xiang Q, Wei H. GPR120 promotes adipogenesis through intracellular calcium and extracellular signal-regulated kinase 1/2 signal pathway. *Mol Cell Endocrinol* 2016;434:1-13.
9. Hilgendorf KI, Johnson CT, Mezger A, Rice SL, Norris AM, Demeter J, Greenleaf WJ, Reiter JF, Kopinke D, Jackson PK. Omega-3 Fatty Acids Activate Ciliary FFAR4 to Control Adipogenesis. *Cell* 2019;179(6):1289-1305.e1221.
10. Quesada-Lopez T, Cereijo R, Turatsinze JV, Planavila A, Cairo M, Gavalda-Navarro A, Peyrou M, Moure R, Iglesias R, Giralt M, Eizirik DL, Villarroya F. The lipid sensor GPR120 promotes brown fat activation and FGF21 release from adipocytes. *Nat Commun* 2016;7:13479.



- 348 11. Schilperoort M, van Dam AD, Hoeke G, Shabalina IG, Okolo A, Hanyaloglu AC, Dib LH,  
349 Mol IM, Caengprasath N, Chan Y-W, Damak S, Miller AR, Coskun T, Shimpukade B, Ulven T,  
350 Kooijman S, Rensen PC, Christian M. The GPR120 agonist TUG-891 promotes metabolic health  
351 by stimulating mitochondrial respiration in brown fat. *EMBO Mol Med* 2018;10(3):e8047.
- 352 12. Auguste S, Fiset A, Fernandes MF, Hryhorczuk C, Poitout V, Alquier T, Fulton S. Central  
353 Agonism of GPR120 Acutely Inhibits Food Intake and Food Reward and Chronically Suppresses  
354 Anxiety-Like Behavior in Mice. *Int J Neuropsychopharmacol* 2016;19(7):pyw014.
- 355 13. Lu X, Zhao X, Feng J, Liou AP, Anthony S, Pechhold S, Sun Y, Lu H, Wank S.  
356 Postprandial inhibition of gastric ghrelin secretion by long-chain fatty acid through GPR120 in  
357 isolated gastric ghrelin cells and mice. *Am J Physiol Gastrointest Liver Physiol*  
358 2012;303(3):G367-376.
- 359 14. Engelstoft MS, Park WM, Sakata I, Kristensen LV, Husted AS, Osborne-Lawrence S, Piper  
360 PK, Walker AK, Pedersen MH, Nohr MK, Pan J, Sinz CJ, Carrington PE, Akiyama TE, Jones  
361 RM, Tang C, Ahmed K, Offermanns S, Egerod KL, Zigman JM, Schwartz TW. Seven  
362 transmembrane G protein-coupled receptor repertoire of gastric ghrelin cells. *Mol Metab*  
363 2013;2(4):376-392.
- 364 15. Gong Z, Yoshimura M, Aizawa S, Kurotani R, Zigman JM, Sakai T, Sakata I. G protein-  
365 coupled receptor 120 signaling regulates ghrelin secretion in vivo and in vitro. *Am J Physiol*  
366 *Endocrinol Metab* 2014;306(1):E28-35.
- 367 16. Hirasawa A, Tsumaya K, Awaji T, Katsuma S, Adachi T, Yamada M, Sugimoto Y,  
368 Miyazaki S, Tsujimoto G. Free fatty acids regulate gut incretin glucagon-like peptide-1 secretion  
369 through GPR120. *Nat Med* 2005;11(1):90-94.

370 17. Iwasaki K, Harada N, Sasaki K, Yamane S, Iida K, Suzuki K, Hamasaki A, Nasteska D,  
371 Shibue K, Joo E, Harada T, Hashimoto T, Asakawa Y, Hirasawa A, Inagaki N. Free fatty acid  
372 receptor GPR120 is highly expressed in enteroendocrine K cells of the upper small intestine and  
373 has a critical role in GIP secretion after fat ingestion. *Endocrinology* 2015;156(3):837-846.

374 18. Tanaka T, Katsuma S, Adachi T, Koshimizu TA, Hirasawa A, Tsujimoto G. Free fatty acids  
375 induce cholecystokinin secretion through GPR120. *Naunyn-Schmiedeberg's Arch Pharmacol*  
376 2008;377(4-6):523-527.

377 19. Sankoda A, Harada N, Iwasaki K, Yamane S, Murata Y, Shibue K, Thewjitcharoen Y,  
378 Suzuki K, Harada T, Kanemaru Y, Shimazu-Kuwahara S, Hirasawa A, Inagaki N. Long-Chain  
379 Free Fatty Acid Receptor GPR120 Mediates Oil-Induced GIP Secretion Through CCK in Male  
380 Mice. *Endocrinology* 2017;158(5):1172-1180.

381 20. Wang Y, Xie T, Zhang D, Leung PS. GPR120 protects lipotoxicity-induced pancreatic  $\beta$ -cell  
382 dysfunction through regulation of PDX1 expression and inhibition of islet inflammation. *Clin Sci*  
383 (*Lond*) 2019;133(1):101-116.

384 21. Taneera J, Lang S, Sharma A, Fadista J, Zhou Y, Ahlqvist E, Jonsson A, Lyssenko V,  
385 Vikman P, Hansson O, Parikh H, Korsgren O, Soni A, Krus U, Zhang E, Jing XJ, Esguerra JL,  
386 Wollheim CB, Salehi A, Rosengren A, Renstrom E, Groop L. A systems genetics approach  
387 identifies genes and pathways for type 2 diabetes in human islets. *Cell Metab* 2012;16(1):122-  
388 134.

389 22. Moran BM, Abdel-Wahab YH, Flatt PR, McKillop AM. Evaluation of the insulin-releasing  
390 and glucose-lowering effects of GPR120 activation in pancreatic beta-cells. *Diabetes Obes*  
391 *Metab* 2014;16(11):1128-1139.

23. Sundstrom L, Myhre S, Sundqvist M, Ahnmark A, McCoull W, Raubo P, Groombridge SD, Polla M, Nystrom AC, Kristensson L, Nagard M, Winzell MS. The acute glucose lowering effect of specific GPR120 activation in mice is mainly driven by glucagon-like peptide 1. *PLoS One* 2017;12(12):e0189060.
24. Zhang D, So WY, Wang Y, Wu SY, Cheng Q, Leung PS. Insulinotropic effects of GPR120 agonists are altered in obese diabetic and obese non-diabetic states. *Clin Sci (Lond)* 2017;131(3):247-260.
25. McCloskey AG, Miskelly MG, Flatt PR, McKillop AM. Pharmacological potential of novel agonists for FFAR4 on islet and enteroendocrine cell function and glucose homeostasis. *Eur J Pharm Sci* 2020;142:105104.
26. Suckow AT, Polidori D, Yan W, Chon S, Ma JY, Leonard J, Briscoe CP. Alteration of the Glucagon Axis in GPR120 (FFAR4) Knockout Mice: A role for GPR120 in glucagon secretion. *J Biol Chem* 2014;289(22):15751-15763.
27. Stone VM, Dhayal S, Brocklehurst KJ, Lenaghan C, Sorhede Winzell M, Hammar M, Xu X, Smith DM, Morgan NG. GPR120 (FFAR4) is preferentially expressed in pancreatic delta cells and regulates somatostatin secretion from murine islets of Langerhans. *Diabetologia* 2014;57(6):1182-1191.
28. Croze ML, Flisher M, Guillaume A, Tremblay C, Granziera S, Noguchi GM, Vivot K, Ghislain J, Huising MO, Poitout V. Free-fatty acid receptor 4 inhibitory signaling in delta cells regulates islet hormone secretion in mice. *bioRxiv* 2020:2020.2007.2017.208637.
29. Itoh Y, Kawamata Y, Harada M, Kobayashi M, Fujii R, Fukusumi S, Ogi K, Hosoya M, Tanaka Y, Uejima H, Tanaka H, Maruyama M, Satoh R, Okubo S, Kizawa H, Komatsu H, Matsumura F, Noguchi Y, Shinohara T, Hinuma S, Fujisawa Y, Fujino M. Free fatty acids

415 regulate insulin secretion from pancreatic beta cells through GPR40. *Nature*  
416 2003;422(6928):173-176.

417 30. Briscoe CP, Tadayyon M, Andrews JL, Benson WG, Chambers JK, Eilert MM, Ellis C,  
418 Elshourbagy NA, Goetz AS, Minnick DT, Murdock PR, Sauls HR, Jr., Shabon U, Spinage LD,  
419 Strum JC, Szekeres PG, Tan KB, Way JM, Ignar DM, Wilson S, Muir AI. The orphan G protein-  
420 coupled receptor GPR40 is activated by medium and long chain fatty acids. *J Biol Chem*  
421 2003;278(13):11303-11311.

422 31. Latour MG, Alquier T, Oseid E, Tremblay C, Jetton TL, Luo J, Lin DC, Poitout V. GPR40  
423 is necessary but not sufficient for fatty acid stimulation of insulin secretion in vivo. *Diabetes*  
424 2007;56(4):1087-1094.

425 32. Ferdaoussi M, Bergeron V, Zarrouki B, Kolic J, Cantley J, Fielitz J, Olson EN, Prentki M,  
426 Biden T, Macdonald PE, Poitout V. G protein-coupled receptor (GPR)40-dependent potentiation  
427 of insulin secretion in mouse islets is mediated by protein kinase D1. *Diabetologia*  
428 2012;55(10):2682-2692.

429 33. Edfalk S, Steneberg P, Edlund H. Gpr40 is expressed in enteroendocrine cells and mediates  
430 free fatty acid stimulation of incretin secretion. *Diabetes* 2008;57(9):2280-2287.

431 34. Xiong Y, Swaminath G, Cao Q, Yang L, Guo Q, Salomonis H, Lu J, Houze JB, Dransfield  
432 PJ, Wang Y, Liu JJ, Wong S, Schwandner R, Steger F, Baribault H, Liu L, Coberly S, Miao L,  
433 Zhang J, Lin DC, Schwarz M. Activation of FFA1 mediates GLP-1 secretion in mice. Evidence  
434 for allosterism at FFA1. *Mol Cell Endocrinol* 2013;369(1-2):119-129.

435 35. Liou AP, Lu X, Sei Y, Zhao X, Pechhold S, Carrero RJ, Raybould HE, Wank S. The G-  
436 protein-coupled receptor GPR40 directly mediates long-chain fatty acid-induced secretion of  
437 cholecystokinin. *Gastroenterology* 2011;140(3):903-912.

36. Ekberg JH, Hauge M, Kristensen LV, Madsen AN, Engelstoft MS, Husted AS, Sichlau R, Egerod KL, Timshel P, Kowalski TJ, Gribble FM, Reiman F, Hansen HS, Howard AD, Holst B, Schwartz TW. GPR119, a Major Enteroendocrine Sensor of Dietary Triglyceride Metabolites Coacting in Synergy With FFA1 (GPR40). *Endocrinology* 2016;157(12):4561-4569.
37. Tunaru S, Bonnavion R, Brandenburger I, Preussner J, Thomas D, Scholich K, Offermanns S. 20-HETE promotes glucose-stimulated insulin secretion in an autocrine manner through FFAR1. *Nat Commun* 2018;9(1):177.
38. Tan CP, Feng Y, Zhou Y-P, Eiermann GJ, Petrov A, Zhou C, Lin S, Salituro G, Meinke P, Mosley R, Akiyama TE, Einstein M, Kumar S, Berger JP, Mills SG, Thornberry NA, Yang L, Howard AD. Selective small-molecule agonists of G protein-coupled receptor 40 promote glucose-dependent insulin secretion and reduce blood glucose in mice. *Diabetes* 2008;57(8):2211-2219.
39. Alquier T, Peyot ML, Latour MG, Kebede M, Sorensen CM, Gesta S, Ronald Kahn C, Smith RD, Jetton TL, Metz TO, Prentki M, Poitout V. Deletion of GPR40 impairs glucose-induced insulin secretion in vivo in mice without affecting intracellular fuel metabolism in islets. *Diabetes* 2009;58(11):2607-2615.
40. Kebede M, Alquier T, Latour MG, Semache M, Tremblay C, Poitout V. The fatty acid receptor GPR40 plays a role in insulin secretion in vivo after high-fat feeding. *Diabetes* 2008;57(9):2432-2437.
41. Satapati S, Qian Y, Wu MS, Petrov A, Dai G, Wang SP, Zhu Y, Shen X, Muise ES, Chen Y, Zycband E, Weinglass A, Di Salvo J, Debenham JS, Cox JM, Lan P, Shah V, Previs SF, Erion M, Kelley DE, Wang L, Howard AD, Shang J. GPR120 suppresses adipose tissue lipolysis and synergizes with GPR40 in antidiabetic efficacy. *J Lipid Res* 2017;58(8):1561-1578.

42. Croze ML, Guillaume A, Ethier M, Fergusson G, Ghislain J, Poitout V. Data from: FFAR1 and FFAR4 additively cooperate to control glucose tolerance and insulin secretion in male mice. *figshare*. 2020. Deposited 4 August 2020. <https://doi.org/10.6084/m9.figshare.12759653.v1>
43. Bjursell M, Xu X, Admyre T, Bottcher G, Lundin S, Nilsson R, Stone VM, Morgan NG, Lam YY, Storlien LH, Linden D, Smith DM, Bohlooly YM, Oscarsson J. The beneficial effects of n-3 polyunsaturated fatty acids on diet induced obesity and impaired glucose control do not require Gpr120. *PLoS One* 2014;9(12):e114942.
44. Lan H, Hoos LM, Liu L, Tetzloff G, Hu W, Abbondanzo SJ, Vassileva G, Gustafson EL, Hedrick JA, Davis HR. Lack of FFAR1/GPR40 does not protect mice from high-fat diet-induced metabolic disease. *Diabetes* 2008;57(11):2999-3006.
45. Fergusson G, Ethier M, Guevremont M, Chretien C, Attane C, Joly E, Fioramonti X, Prentki M, Poitout V, Alquier T. Defective insulin secretory response to intravenous glucose in C57Bl/6J compared to C57Bl/6N mice. *Mol Metab* 2014;3(9):848-854.
46. Mauvais-Jarvis F. Epidemiology of Gender Differences in Diabetes and Obesity. *Adv Exp Med Biol* 2017;1043:3-8.

## FIGURE LEGENDS

**Figure 1. Energy balance in Gpr40 and Gpr120 single and double knockout (KO) mice under chow diet (CD).** (A) Study plan to assess energy and glucose homeostasis in wild-type (WT), Gpr40KO (40KO), Gpr120KO (120KO) and Gpr120/40KO (120/40KO) male and female mice fed CD. (B-G) body weight (B, C), cumulative energy intake (D, E) and fat and lean mass as a percentage of body weight measured by Echo-MRI at 27-29 weeks of age (F, G) in male (B, D, F) and female (C, E, G) mice. Data are presented as mean +/- SEM (n=6-8 animals per group). P-values were calculated by regular 2-way ANOVA or mixed model when some follow-up values were missing with no assumption of sphericity (B-E) or 2-way ANOVA with post-hoc Tukey's multiple comparisons test (F, G). \*p < 0.05.

**Figure 2. Glucose homeostasis in Gpr40 and Gpr120 single and double knockout (KO) mice under chow diet (CD).** (A, B) fasted blood glucose at 12, 16, 20 and 24 weeks of age in wild-type (WT), Gpr40KO (40KO), Gpr120KO (120KO) and Gpr120/40KO (120/40KO) male (A) and female (B) mice fed CD. (C-F) Blood glucose during an oGTT (glucose 1g/kg BW at 0 min) at 10-12 (C, D) and at 18-20 (E, F) weeks of age in male (C, E) and female (D, F) mice. Data are presented as mean +/- SEM (n=7-13 animals per group). P-values were calculated by regular 2-way ANOVA or mixed model when some values were missing, with no assumption of sphericity and with Tukey's multiple comparisons tests. \*\*p<0.01 and \*p<0.05, 120/40KO vs WT; &, p<0.05 120/40KO and 120KO vs WT; £, p<0.01 120/40KO and 120KO vs WT, p<0.05 120/40KO and 120KO vs Gpr40KO; \$, at least p<0.05 for 120KO and 40KO vs WT and at least p<0.005 for the 120/40KO vs WT; #, p<0.05 120/40KO vs 40KO; Φ, at least p<0.05 WT vs 120KO; Σ, at least p<0.05 120/40KO and 120KO vs WT.

**Figure 3. Hyperglycemic clamp analysis of Gpr40 and Gpr120 single and double knockout mice under chow diet.** (A-D) Blood glucose (A, B) and plasma insulin (C, D) during the hyperglycemic clamp (HGC) in male (A, C) and female mice (B, D). (E-H) Glucose Infusion Rate (GIR) during the steady state (50-80 min) (E, F) and disposition Index (DI) (G, H) in male (E, G) and female (F, H) mice. Data are presented as mean +/- SEM (n=8-10 animals per group). (A-D) P-values were calculated by the mixed model of 2-way ANOVA with Greisser-Greenhouse correction in case of variance heterogeneity (i.e. no assumption of sphericity) and with Tukey's post-hoc multiple comparisons tests. No significant effect of genotype on blood glucose or plasma insulin levels was detected during the steady state (50-80 min) in both males and females. (E-H) P-values were calculated by Brown-Forsythe and Welch's ANOVA (E) or ordinary one-way ANOVA (F-H) with Dunnett's T3 or Tukey's post-hoc MCTs, respectively. \*\*p<0.01, \*p<0.05.

**Figure 4. Energy balance in Gpr40 and Gpr120 single and double knockout (KO) mice under chow (CD) or high-fat diet (HFD).** (A) Study plan to assess energy and glucose homeostasis in wild-type (WT), Gpr40KO (40KO), Gpr120KO (120KO) and Gpr120/40KO (120/40KO) male and female mice fed CD or HFD from 8 to 20 weeks of age. (B-G) body weight (B, C), total energy intake at 20 weeks of age (D, E) and fat and lean mass as a percentage of body weight measured by Echo-MRI at 19 weeks of age (F, G) in male (B, D, F) and female (C, E, G) mice. Data are presented as mean +/- SEM (n=7-10 animals per group). P-values were calculated by regular 2-way ANOVA or mixed model when some follow-up values were missing with no assumption of sphericity (B, C) or 2-way ANOVA with post-hoc Tukey's multiple comparisons test (D-G). \*p < 0.05.



**Figure 5. Oral glucose tolerance in Gpr40 and Gpr120 single and double knockout (KO) mice under chow (CD) or high-fat diet (HFD).** (A-H) blood glucose (A, C, E, G) and plasma insulin (B, D, F, H) levels during an oGTT (glucose 1g/kg BW at 0 min) at 20 weeks of age in male (A, B, E, F) and female (C, D, G, H) wild-type (WT), Gpr40KO (40KO), Gpr120KO (120KO) and Gpr120/40KO (120/40KO) mice fed CD (A-D) or HFD (E-H) from 8 to 20 weeks of age. Data are presented as mean  $\pm$  SEM (n=6-8 animals per group). P-values were calculated by regular 2-way ANOVA or mixed model when some values were missing, with no assumption of sphericity and with Tukey's multiple comparisons tests. \*\*p<0.01 and \*p<0.05, 120/40KO vs WT.

**Figure 6. Potentiation of GSIS in response to Cpd A and TAK-875 in islets ex vivo.** Insulin secretion was assessed in 1-h static incubations in response to 2.8 or 16.7 mM glucose with or without the Gpr120 agonists Cpd A (50  $\mu$ M) and the Gpr40 agonist TAK-875 (5  $\mu$ M). (A-C) Insulin secretion presented as a percentage of islet insulin content (A), insulin secretion (B) and insulin content (C). Data represent individual values and are expressed as mean  $\pm$  SEM of 6 independent experiments. P-values were calculated by regular two-way ANOVA with Dunnett's or Tukey's (G-J) post hoc adjustment for multiple comparisons and Welch/Brown-Forsythe correction when necessary to compensate for SD variances. \* p<0.05, \*\* p<0.005.

**Figure 1**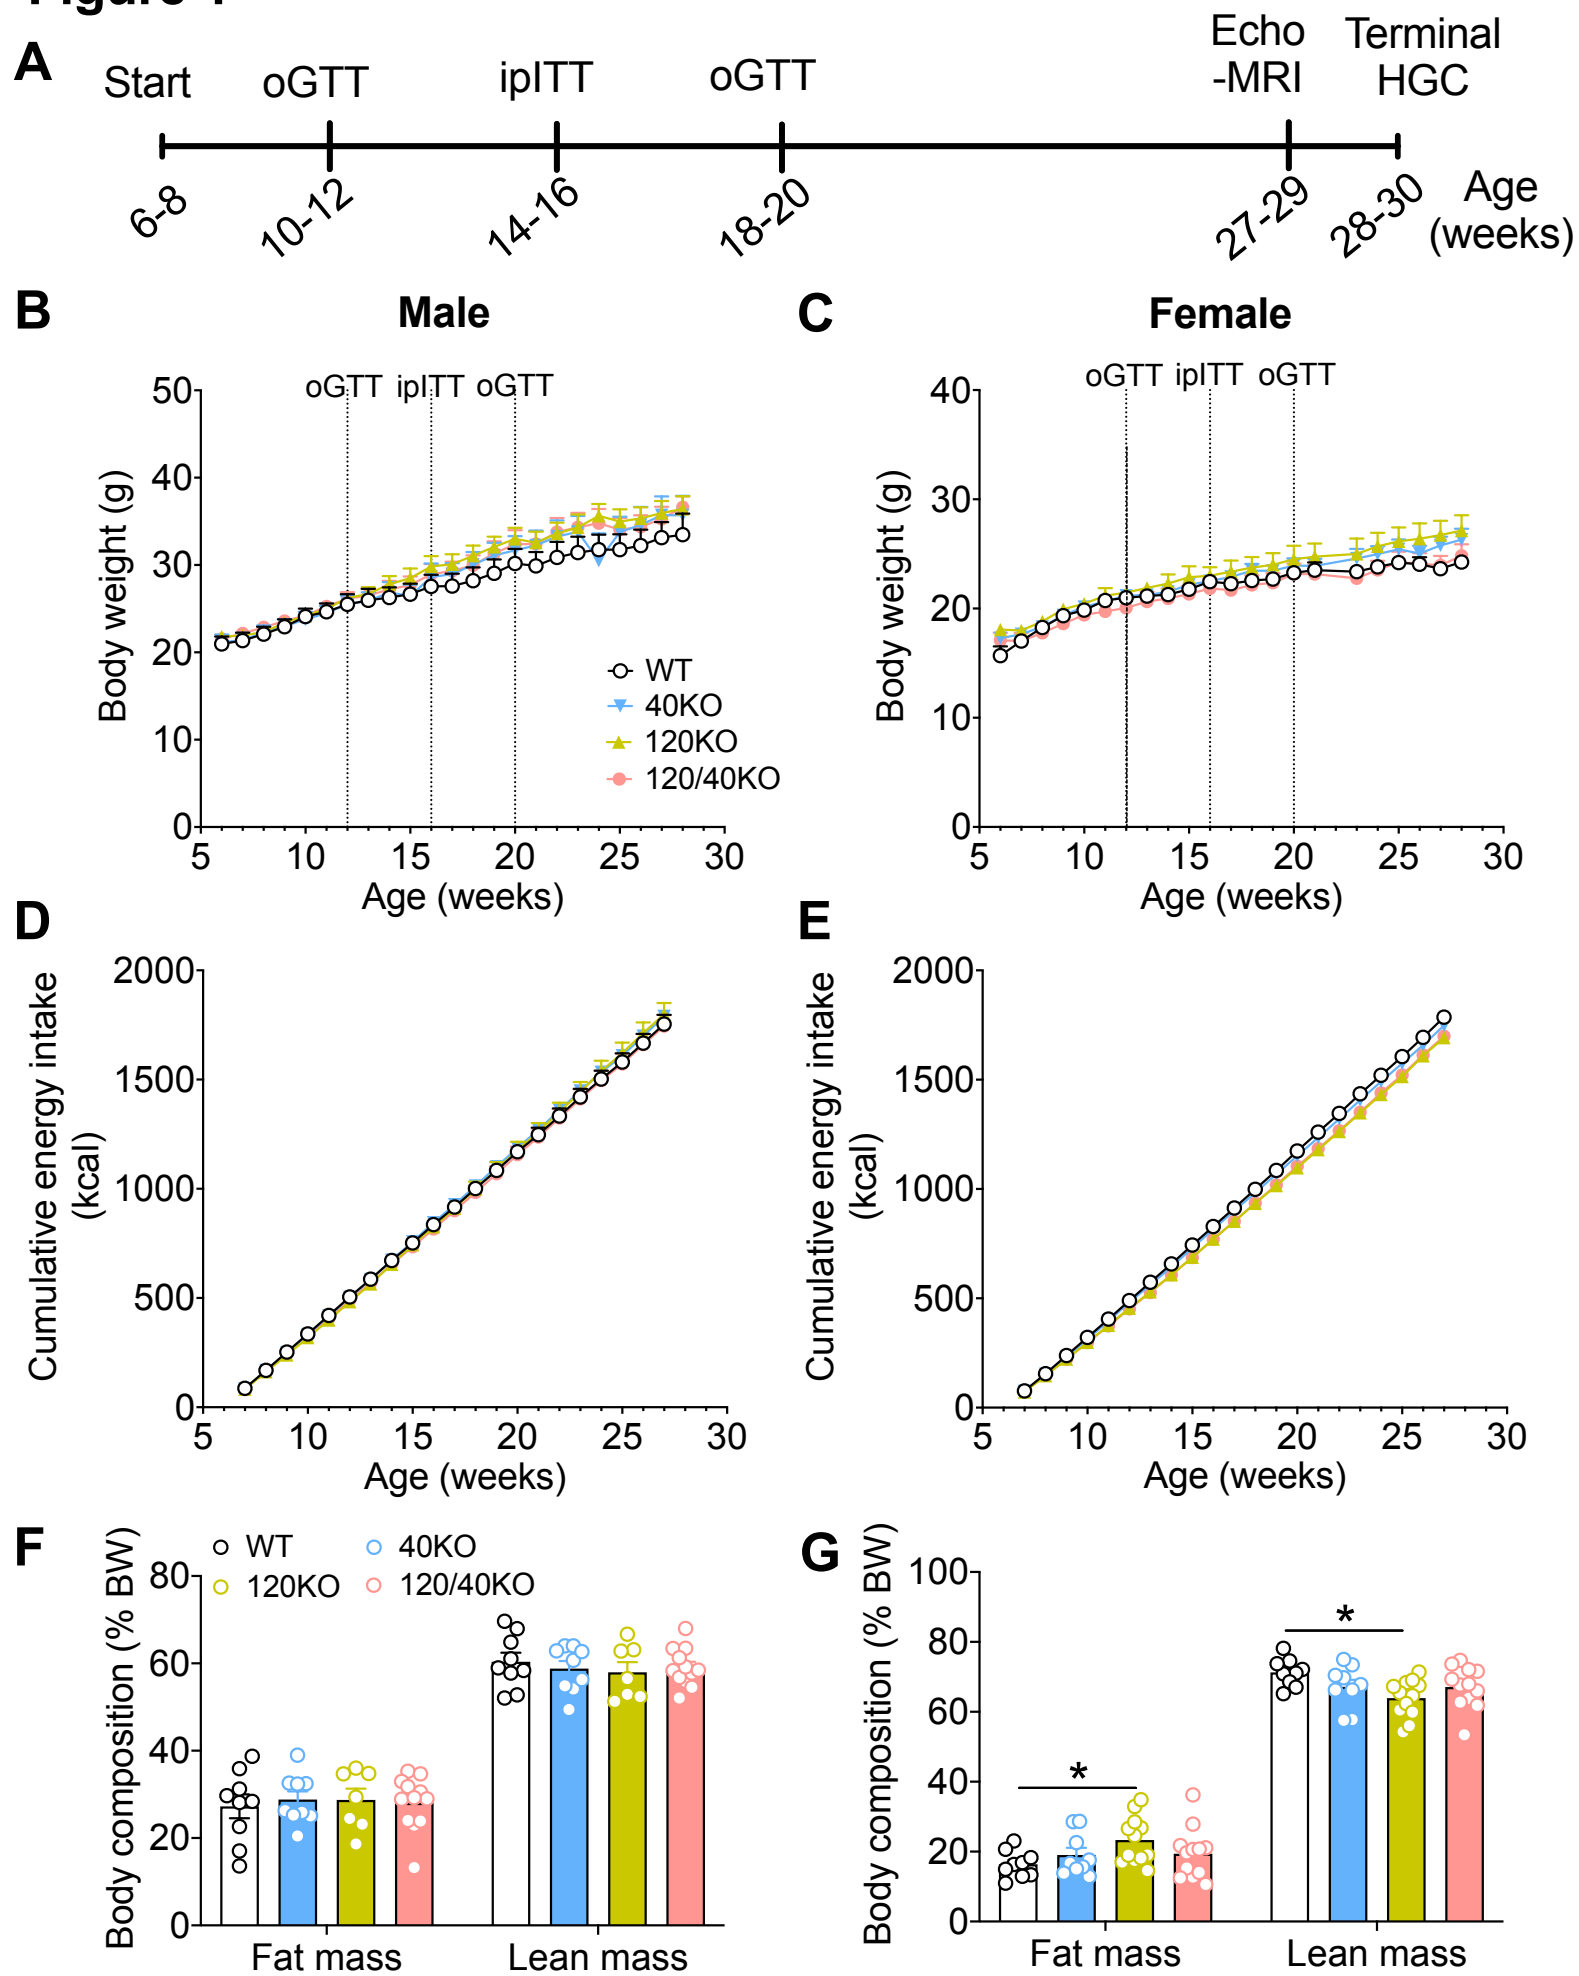

Figure 2

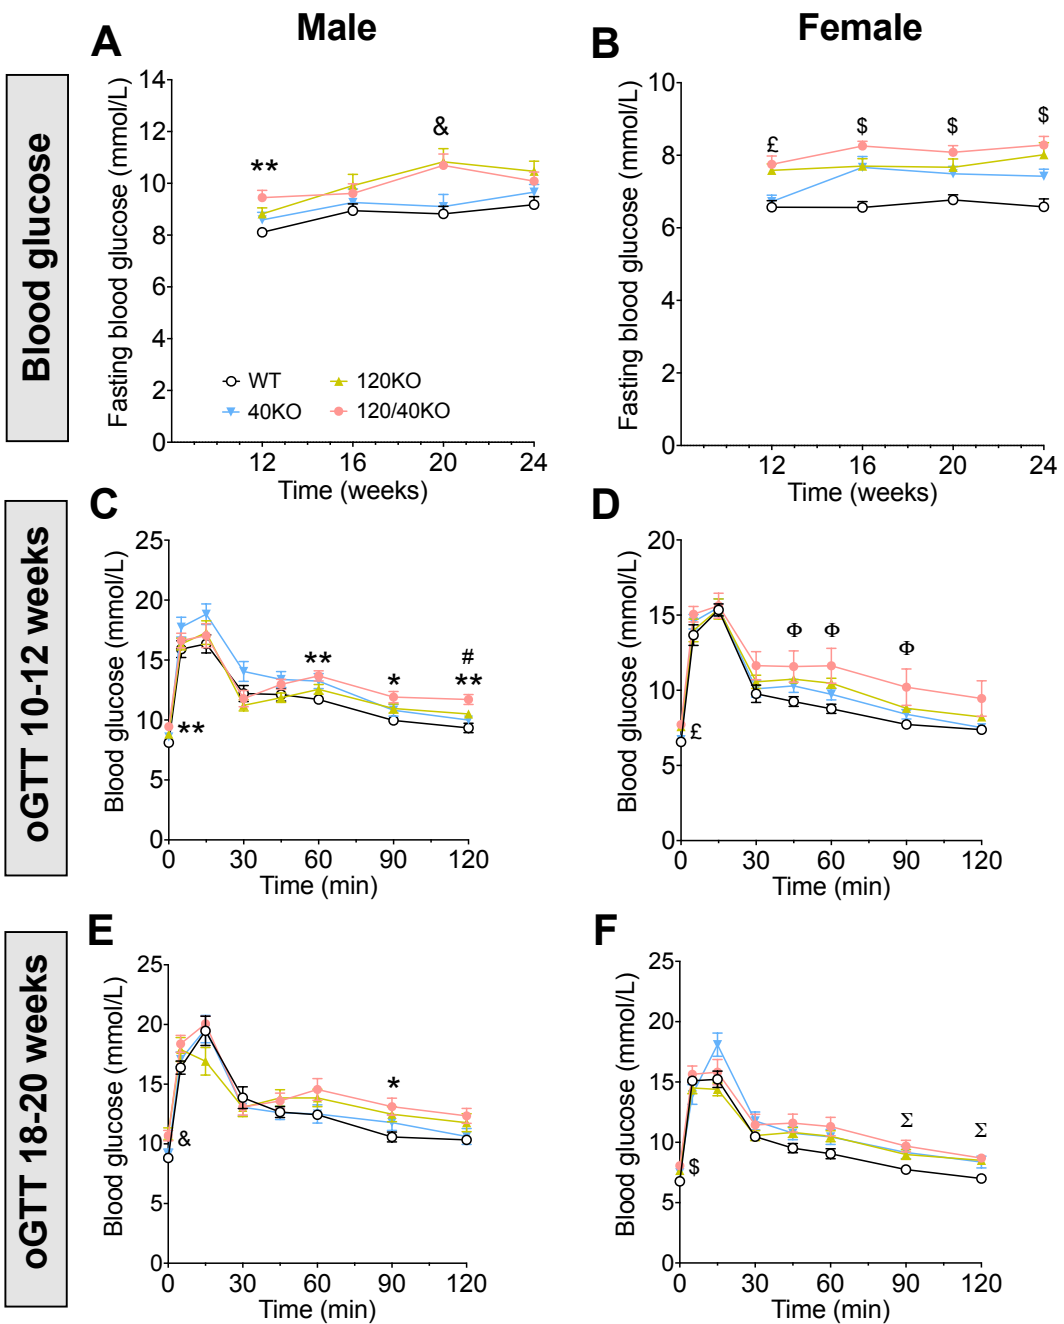

# Figure 3

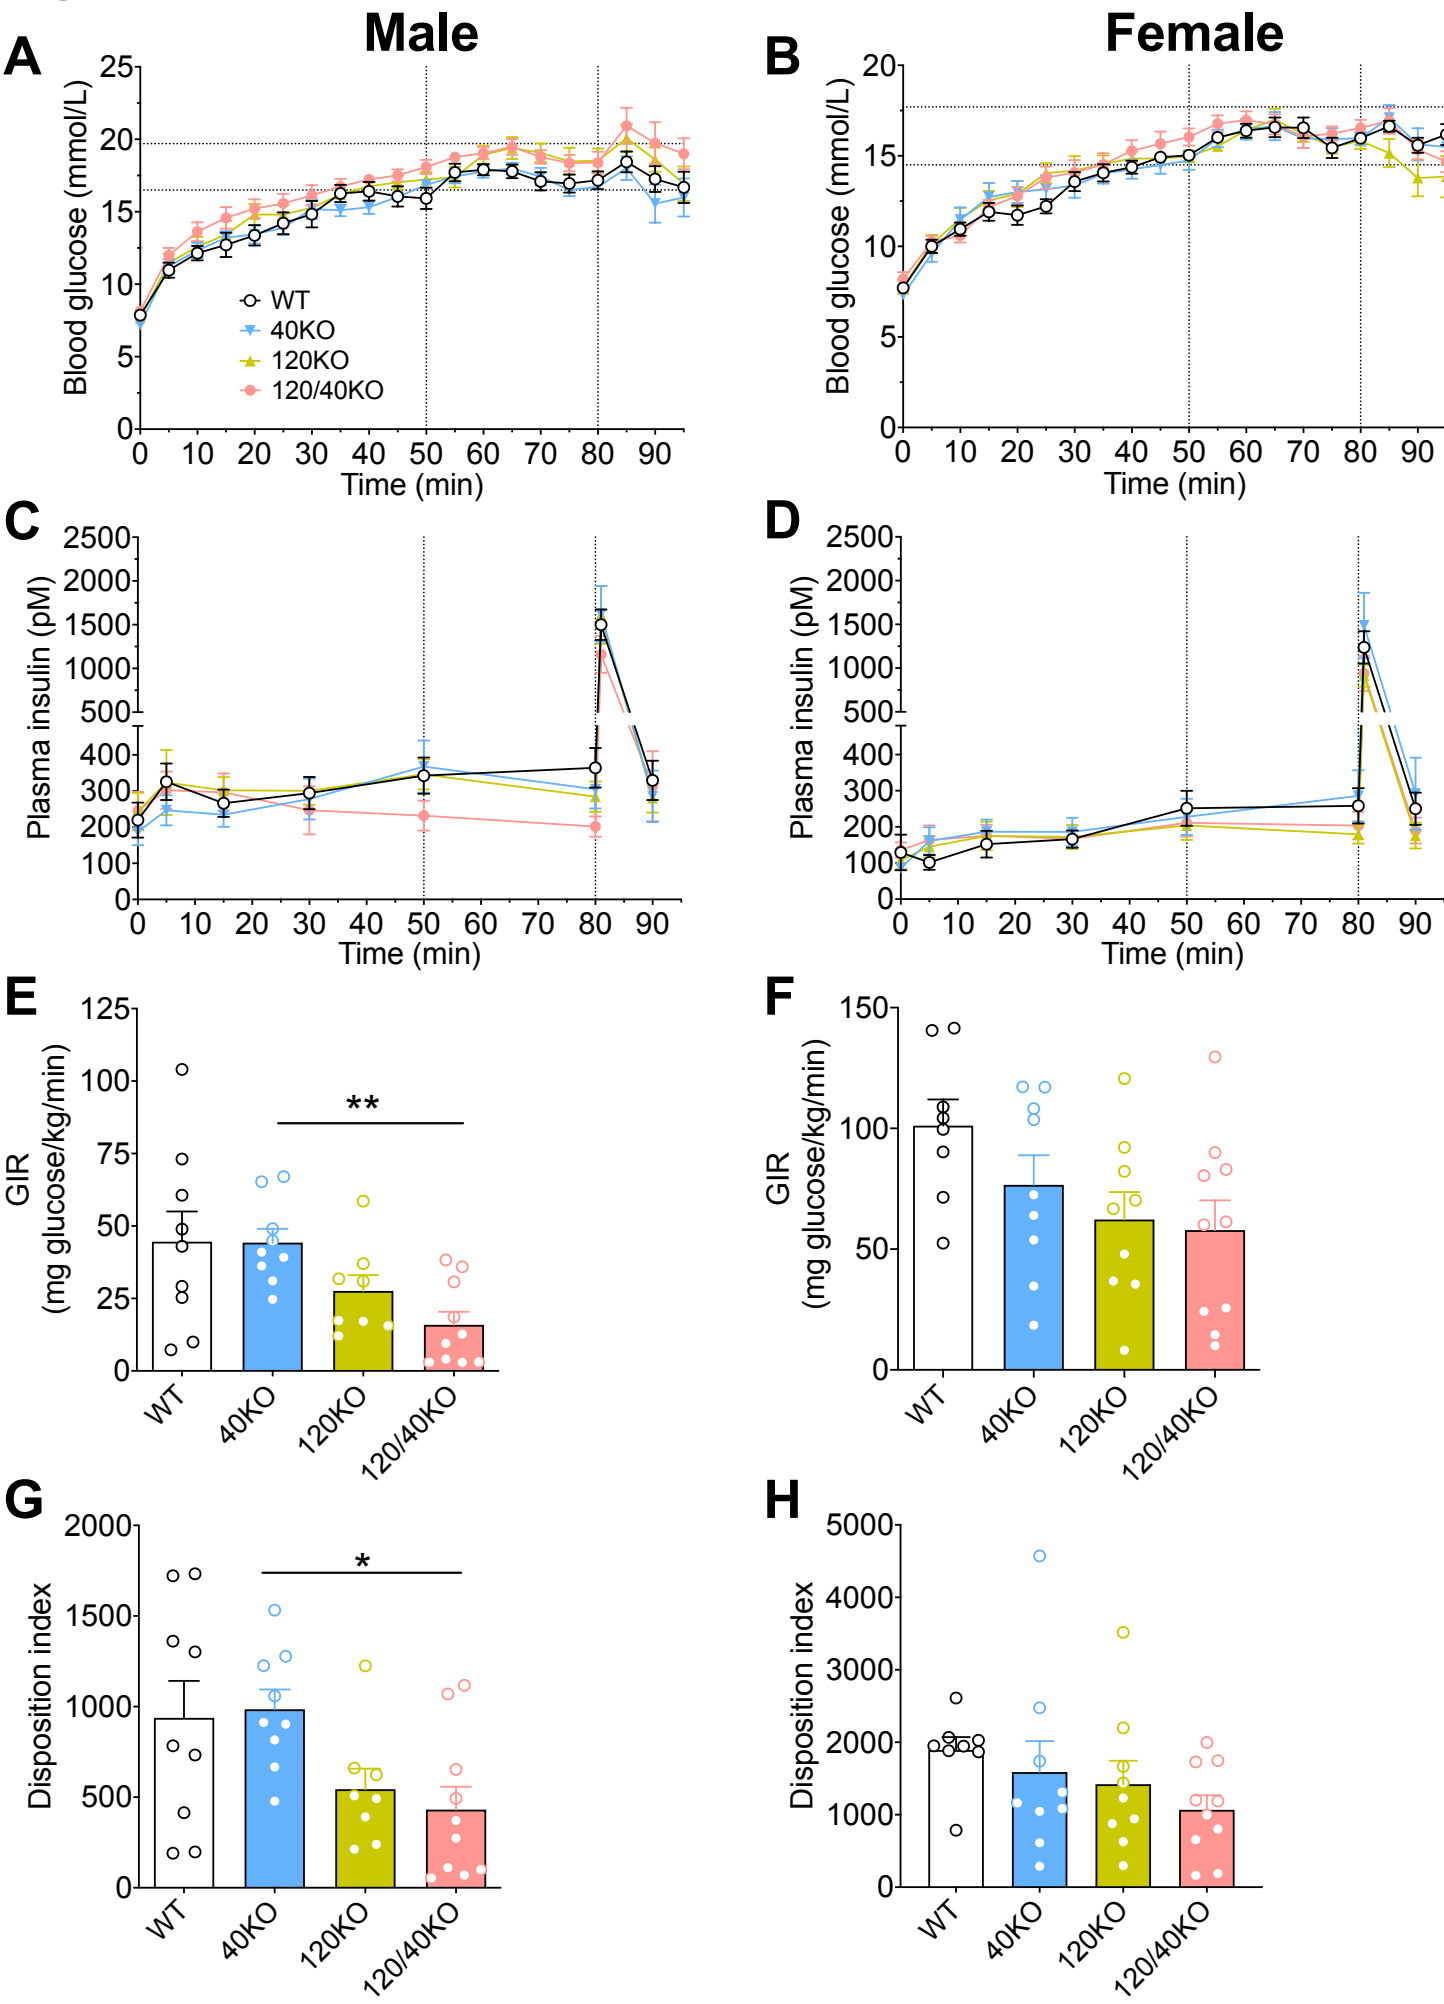

# Figure 4

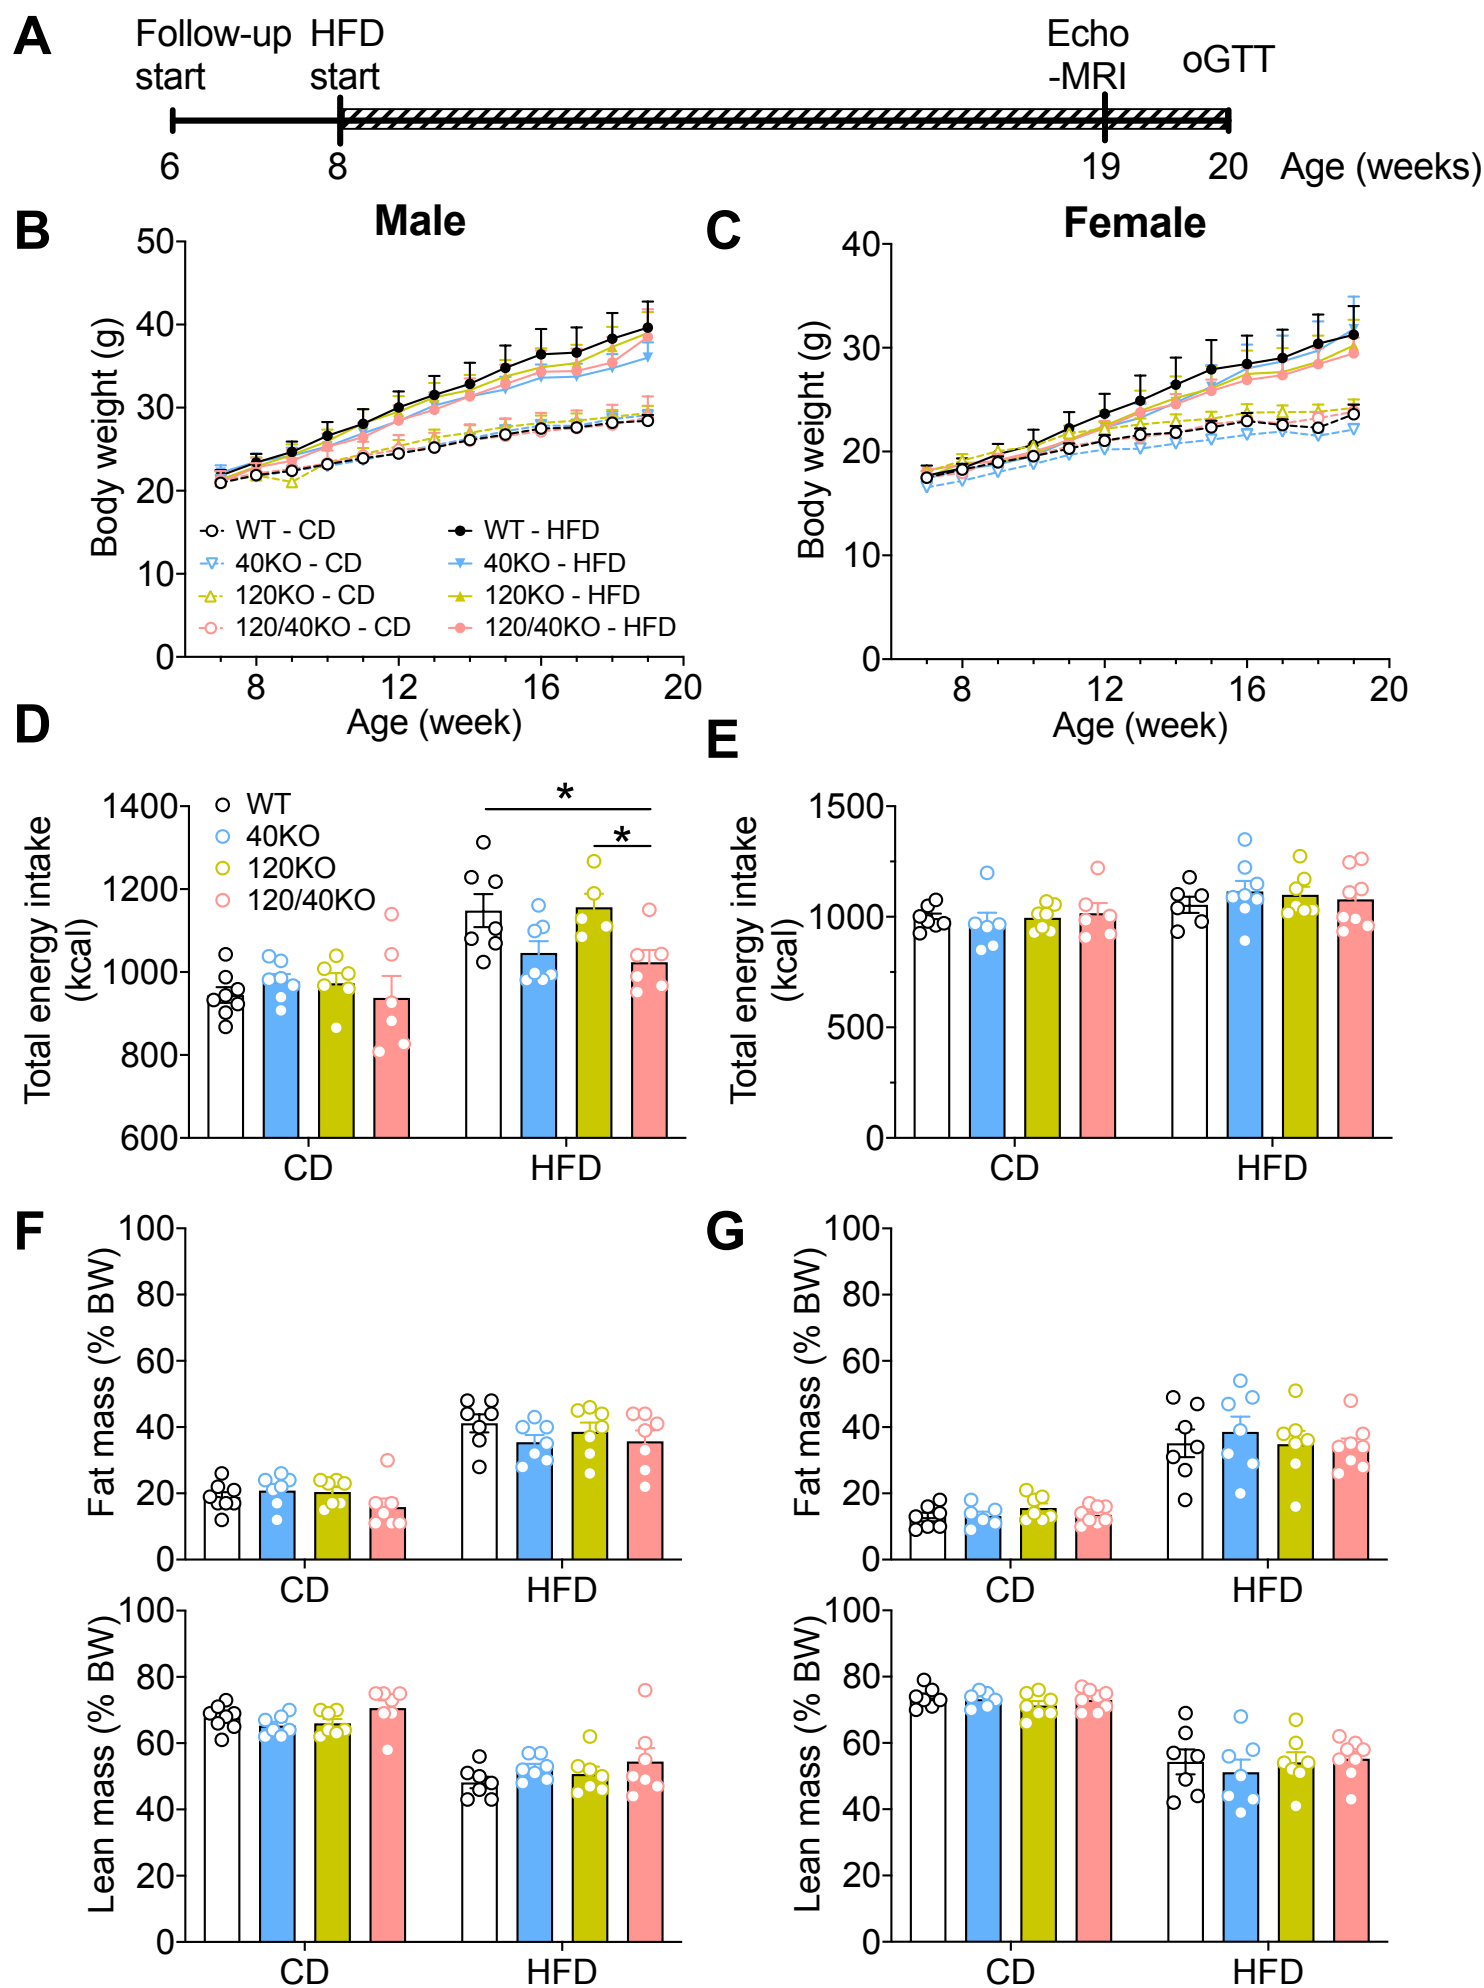

**Figure 5**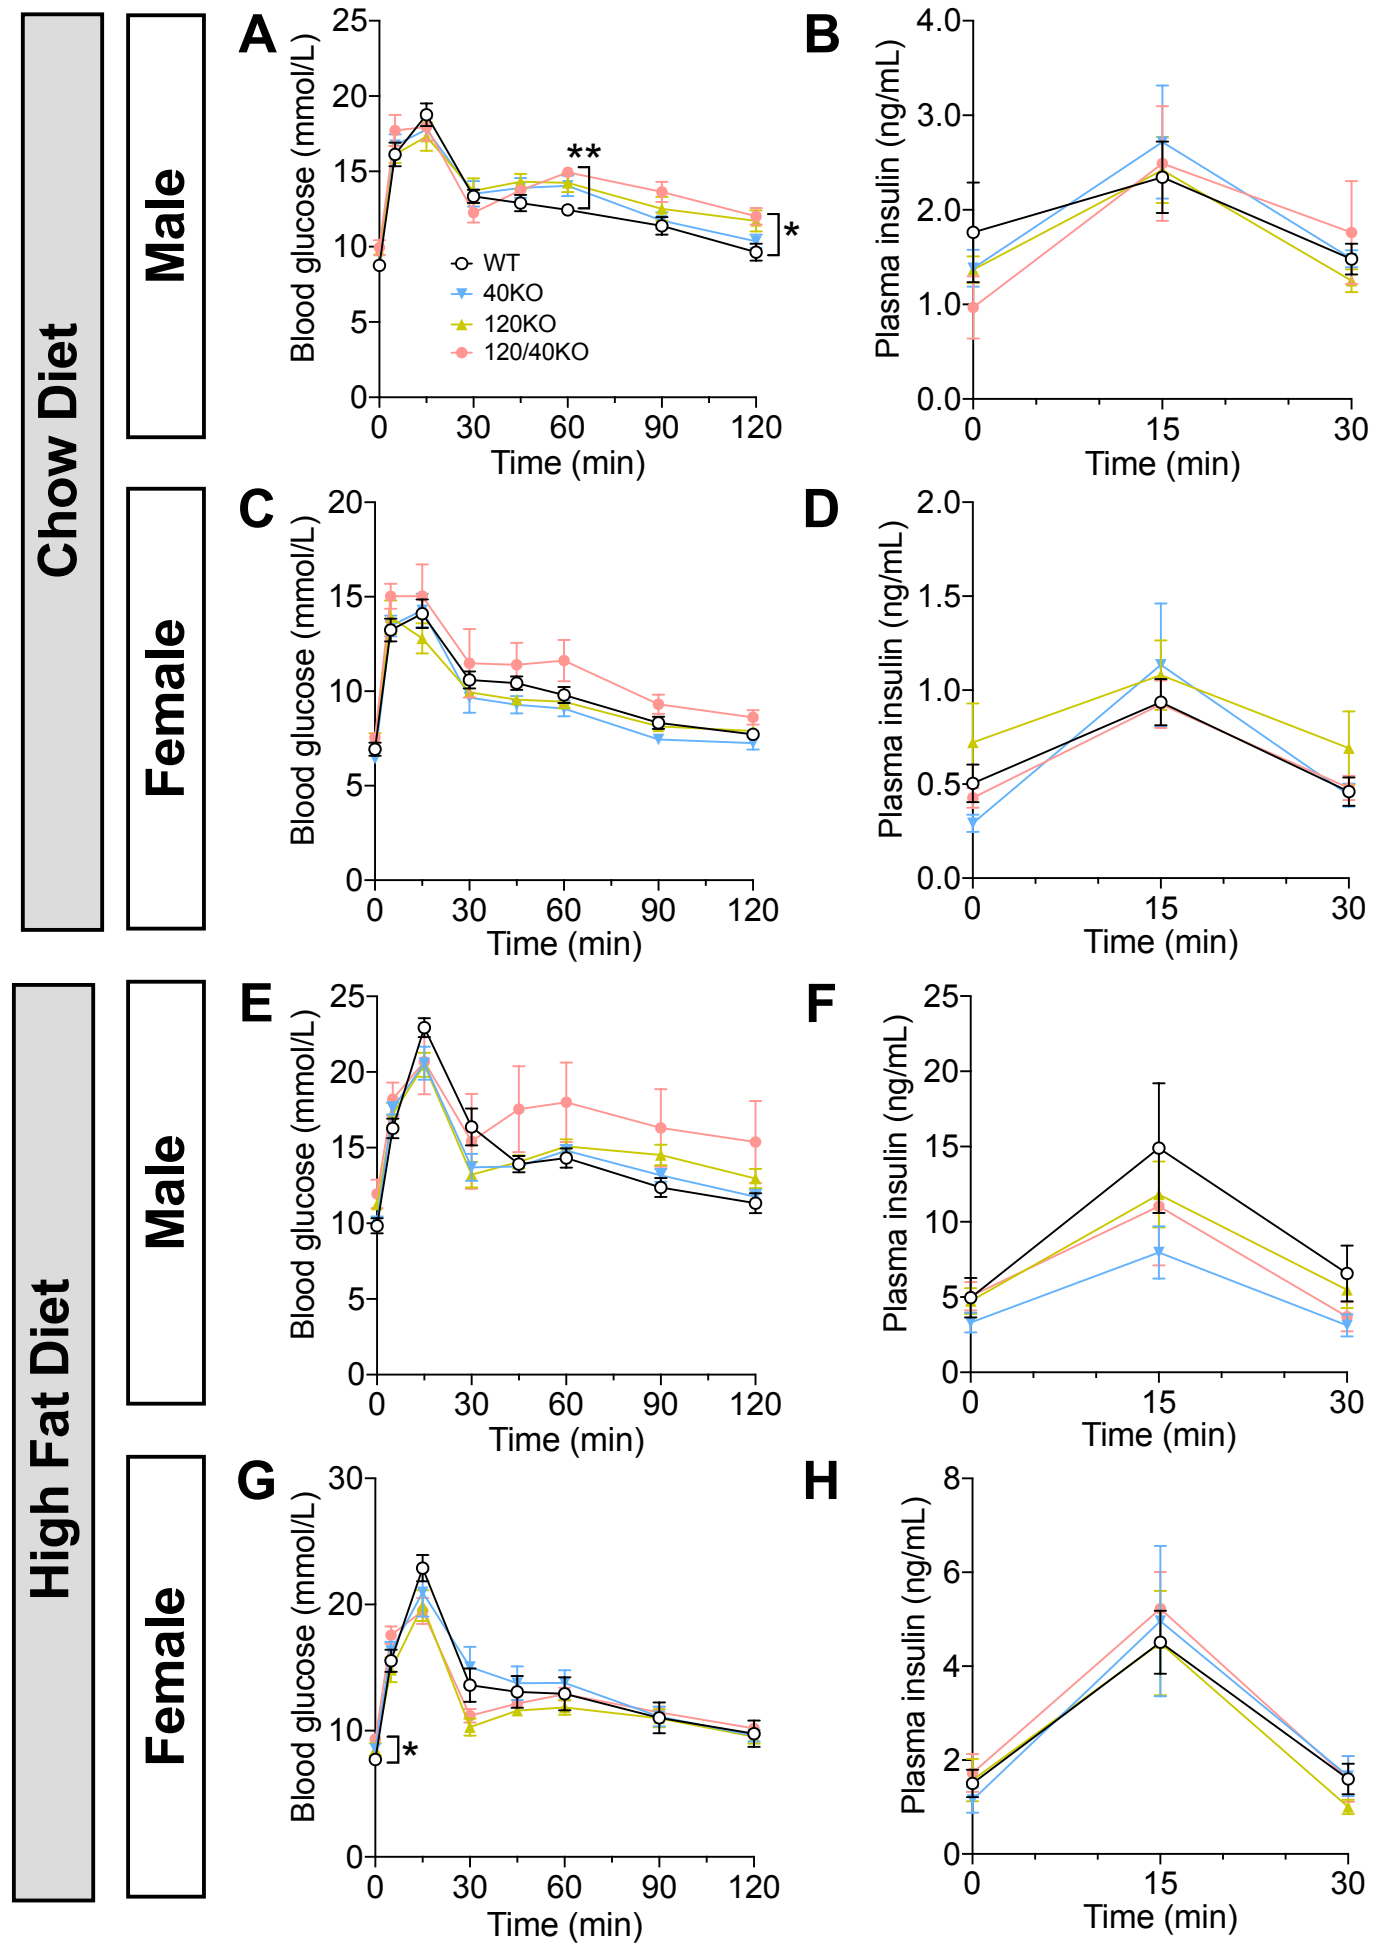

**Figure 6**

**A**

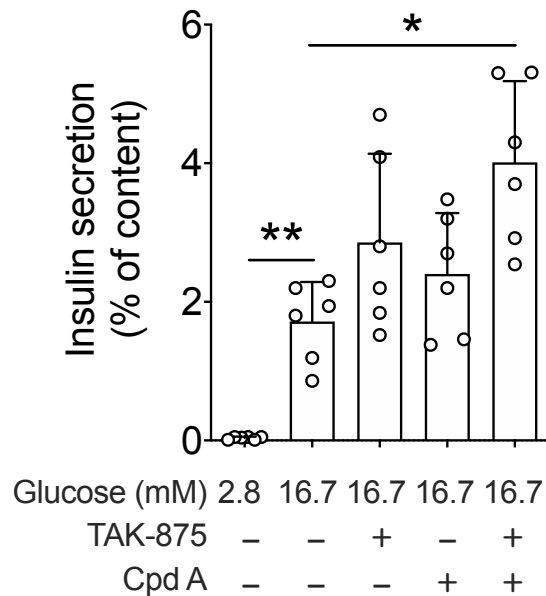

**B**

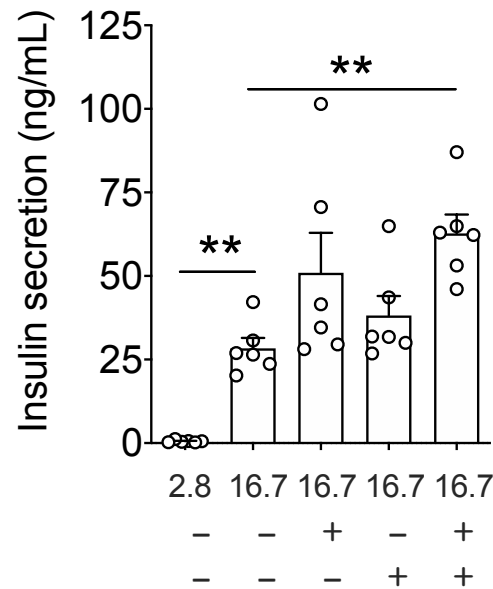

**C**

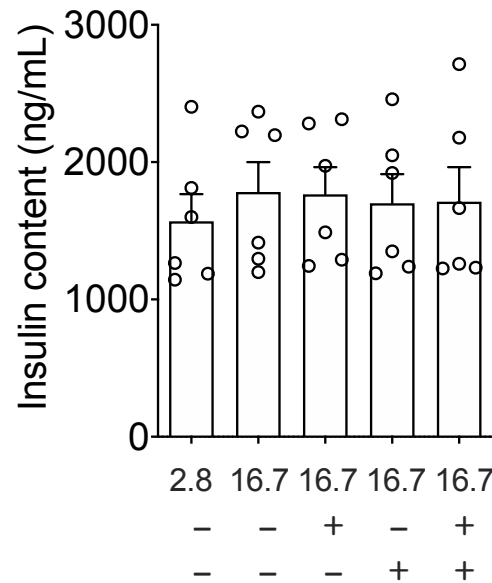

Source: http://biorxiv.org/content/10.1101/2020.08.04.236471v1.full.pdf
